# Supplementary material
Source: publisher figshare collection journal article supplement (https://gsapubs.figshare.com/ndownloader/files/23314811)
Supplement: Supplementary file 1 [file 23314811]

## Sheet: data
	DR-14 Terminal velocity measurements.
																			approximate
																			1-2mm	7.37956	m/s	full interval
																			1-2mm	8.85135	m/s	upper interval only
																			4-8mm	11.6207	m/s
																			linear fit to averages
	The scorias dropped are from F02-25 (top of Kulana Pali, west of Ainahou Road)… slices C and G																		1-2mm	7.6	m/s
																			4-8mm	10.8	m/s
height meters	8.51	12.07	18.62	8.51	8.51	12.07	12.07	18.62	18.62
height feet	27' 11"	39' 7"	61' 1"	27' 11"	27' 11"	39' 7"	39' 7"	61' 1"	61' 1"
	4-8 mm clasts	4-8 mm clasts	4-8 mm clasts	4-8 mm clasts	4-8 mm clasts	4-8 mm clasts	4-8 mm clasts	4-8 mm clasts	4-8 mm clasts
	C slice	C slice	C slice	G slice	G slice	G slice	G slice	G slice	G slice
	1.6	1.7	2.36	1.33		1.79	1.79	2.52	2.52		`
	1.58	1.66	2.64	1.34		1.64	1.64	2.25	2.25
	1.55	1.92	2.3	1.4	1.4	1.76	1.76	2.54	2.54
	1.5	1.73	2,32	1.41	1.41	1.71	1.71	2.47	2.47
	1.49	1.79	2.27	1.44	1.44	1.67	1.67	2.4	2.4
	1.48	1.7	2.33	1.45	1.45			2.53	2.53
	1.47	1.63	2.21	1.46	1.46	1.77	1.77	2.76
	1.47	1.69	2.38	1.5	1.5	1.72	1.72	2.49	2.49
	1.42	1.68	2.31	1.53	1.53	1.94	1.94	2.27	2.27
	1.41	1.89	2.37	1.55	1.55	1.94	1.94	2.28	2.28
	1.497	1.77		1.55	1.55	1.93	1.93	2.34	2.34
				1.55	1.55	1.97	1.97	2.64
avg	1.497	1.74182	2.35222	1.45917	1.484	1.80364	1.80364	2.4575	2.409																									1.5	2.4
height/time	5.6847	6.92954	7.91592	5.8321	5.7345	6.69204	6.69204	7.57681	7.72935																								11.2222	8.5	18.6
	C slice	C slice	C slice	G slice	G slice	G slice	G slice	G slice	G slice
height meters	8.51	12.07	18.62	8.51	8.51	12.07	12.07	18.62	18.62
height feet	27' 11"	39' 7"	61' 1"	27' 11"	27' 11"	39' 7"	39' 7"	61' 1"	61' 1"
	1-2 mm clasts	1-2 mm clasts	1-2 mm clasts	1-2 mm clasts	1-2 mm clasts	1-2 mm clasts	1-2 mm clasts	1-2 mm clasts	1-2 mm clasts
	1.74	2.35	3.41	1.6	1.6	3.25	3.25	3.14	3.14
	2.27	2.44	2.94	1.75	1.75	2.5	2.5	3.18	3.18
	2.04	2.94	4.43	1.81	1.81
	2.35	2.45	3.74	1.88	1.88	2.73	2.73	3.3	3.3
	2.24	2.74	3.18	1.91	1.91	2.72	2.72	3.2	3.2
	1.9	3	3.25	1.94	1.94
	1.9	2.93	3.33	2.03	2.03	2.52	2.52	3.5	3.5
	1.9	2.42	3.28	2.04	2.04	2.75		3.95
	2.21	2.74	3.39	2.06	2.06	2.24		3.05	3.05
	2.12	2.55	3.44	2.1	2.1	2.61	2.61	3.15	3.15
		2.76	3.44	2.15	2.15	2.56	2.56	3.27	3.27
		2.96	3.61	2.25	2.25	2.5	2.5	3.22	3.22
		2.44		2.31	2.31	2.52	2.52	3.9
				2.61		2.57	2.57	3.45	3.45
avg	2.067	2.67077	3.45333	2.03143	1.98692	2.6225	2.648	3.35917	3.246
height/time	4.11708	4.5193	5.39189	4.18917	4.283	4.60248	4.55816	5.54304	5.73629		4.77116

## Sheet: Sheet1
	8.51 m	12.07 m	18.62 m	8.51 m	8.51 m	12.07 m	12.07 m	18.62 m	18.62 m
	27' 11"	39' 7"	61' 1"	27' 11"	27' 11"	39' 7"	39' 7"	61' 1"	61' 1"
	4-8 mm clasts	4-8 mm clasts	4-8 mm clasts	4-8 mm clasts	4-8 mm clasts	4-8 mm clasts	4-8 mm clasts	4-8 mm clasts	4-8 mm clasts
	C slice	C slice	C slice	G slice	G slice	G slice	G slice	G slice	G slice
avg	1.497	1.74182	2.35222	1.45917	1.484	1.80364	1.80364	2.4575	2.409
	C slice	C slice	C slice	G slice	G slice	G slice	G slice	G slice	G slice
	8.51 m	12.07 m	18.62 m	8.51 m	8.51 m	12.07 m	12.07 m	18.62 m	18.62 m
	27' 11"	39' 7"	61' 1"	27' 11"	27' 11"	39' 7"	39' 7"	61' 1"	61' 1"
	1-2 mm clasts	1-2 mm clasts	1-2 mm clasts	1-2 mm clasts	1-2 mm clasts	1-2 mm clasts	1-2 mm clasts	1-2 mm clasts	1-2 mm clasts
avg	2.067	2.67077	3.45333	2.03143	1.98692	2.6225	2.648	3.35917	3.246
